# Supplementary material
Source: PubMed Central journal article supplement (PMC2666580)
Supplement: M808825200_1.pdf [file M808825200_1.pdf]

0 min

1 min

2 min

5 min

30 min

0.1 nM

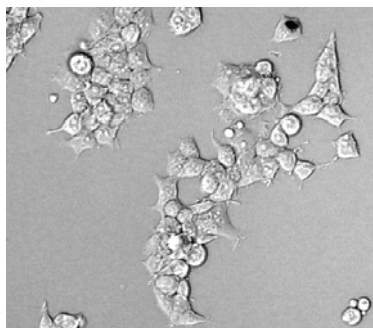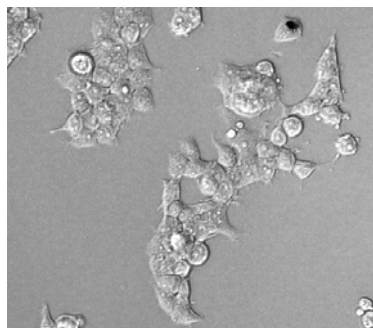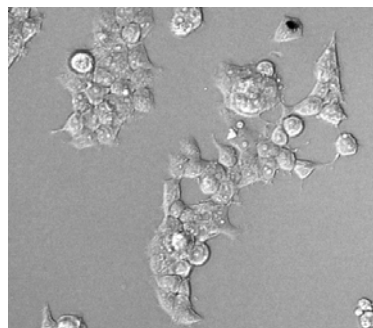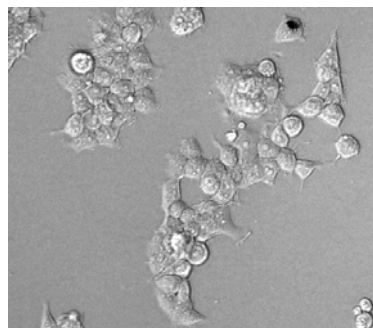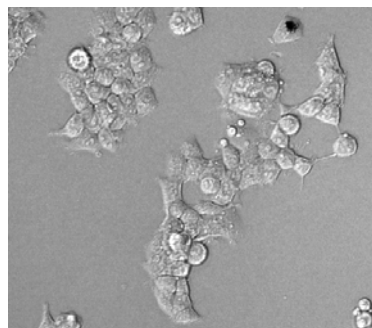

1 nM

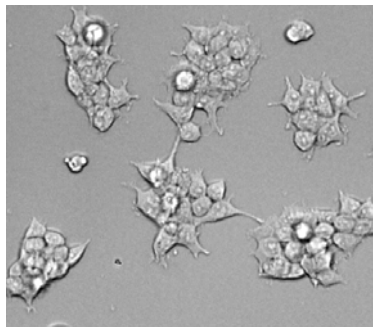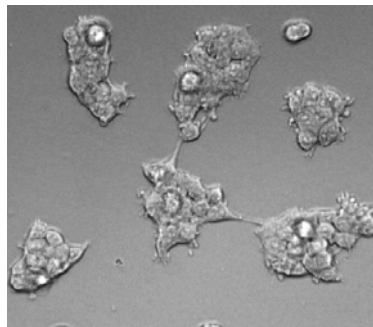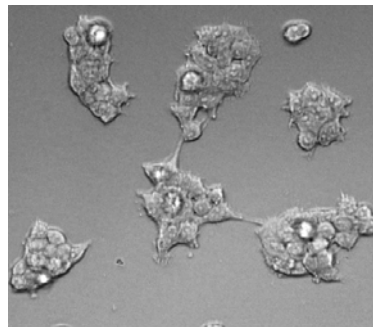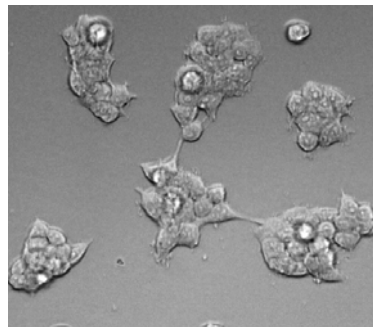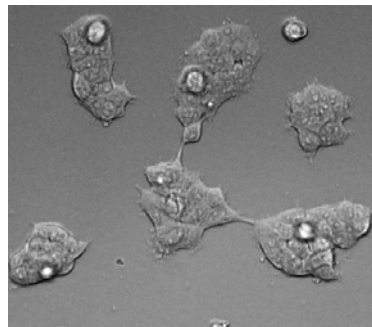

10 nM

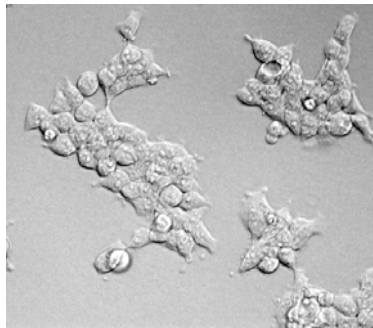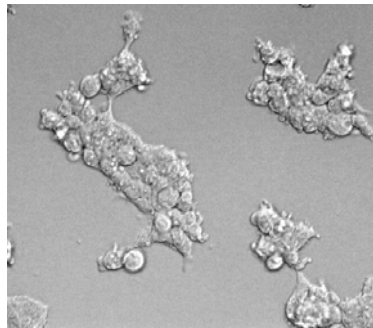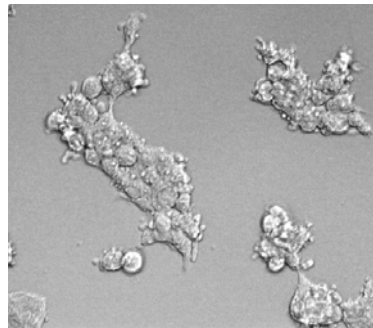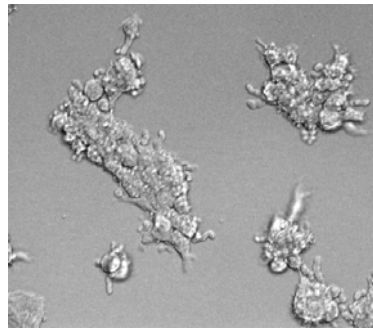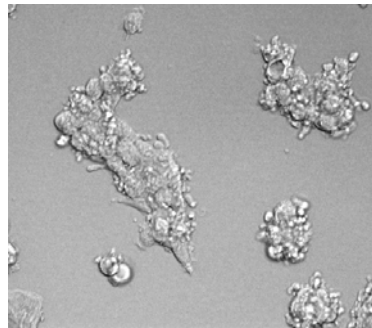

100 nM

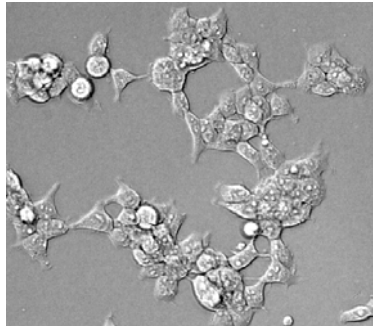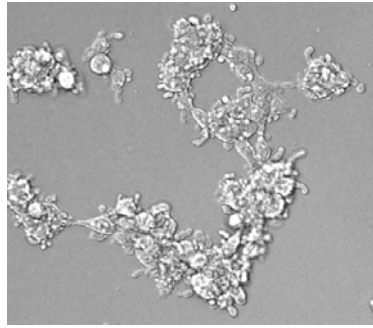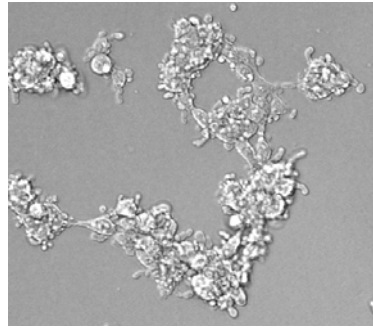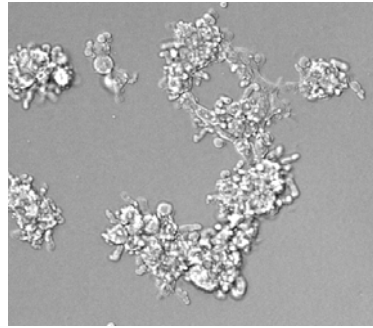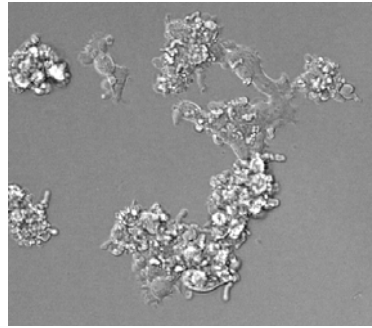

Supplemental. Time lapse imaging of NK1R induced cellular blebbing with multiple doses of SP.
